# Supplementary material
Source: publisher figshare collection journal article supplement (https://tandf.figshare.com/articles/dataset/_/5184814)
Supplement: Supplementary file 1 [file 1]

Archive with 13 entries (13 files):
- Appendices (Blinded).pdf
- BoundaryInitialConditionInterpolator.m
- BoundaryInterpolatorTissueHeating.m
- ExampleBICInterpolatorSimulation.m
- ExampleBICInterpolatorSimulation2.m
- FunctionalGPFit.m
- FunctionalGPPredict.m
- GPFitPredict.m
- InitialConditionAnalyticalApproxInterpolator.m
- Readme.txt
- TissueHeatingExample.m
- functionalPCA.m
- invandlogdet.m
