# Supplementary material
Source: publisher figshare collection journal article supplement (https://tandf.figshare.com/articles/dataset/_/5184814)
Supplement: Supplementary file 1 [file 1 › Readme.txt]

invandlogdet.m - For computing the inverse and natural logarithm of the determinant of a positive definite matrix.
functionalPCA.m -  For computing quantities needed to construct the KL-GP model.
BoundaryInterpolatorTissueHeating.m - Inverse distance interpolator of boundary conditions for the tissue heating example.
InitialConditionAnalyticalApproxInterpolator.m - Inverse distance interpolator for Example 1.
BoundaryInitialConditionInterpolator.m - Inverse distance interpolator of boundary and initial conditions for Appendix F.
FunctionalGPPredict.m - For predicting with the covariance separable GP.
FunctionalGPFit.m - For fitting the covariance separable GP. 
GPFitPredict.m - For fitting GP models to the coefficients of the KL-GP model.
ExampleBICInterpolatorSimulation2.m - For generating the simulation results for Example 1.
ExampleBICInterpolatorSimulation.m - For generating the simulation results for Appendix F.
TissueHeatingExample.m - For generating the simulation results for the tissue heating example.
